# Supplementary material for: Development and validation of a CCD-laser aerosol detective system for measuring the ambient aerosol phase function
Source: Copernicus journal article supplement (doi:10.5194/amt-10-2313-2017), 2017-06-27
Supplement: Supplementary file 1 [file amt-10-2313-2017-supplement.zip]

Archive with 2 entries (2 files):
- amt-10-2313-2017-supplement-title-page.pdf
- Aerosol Phase Function Data.xlsx
