# Supplementary material for: Development and validation of a CCD-laser aerosol detective system for measuring the ambient aerosol phase function
Source: Copernicus journal article supplement (doi:10.5194/amt-10-2313-2017), 2017-06-27
Supplement: Supplementary file 1 [file amt-10-2313-2017-supplement.zip › Aerosol Phase Function Data.xlsx]

## Sheet: Sheet1
Angle (deg)	Aerosol Phase Function (a.u.)
10	6.28408
10.5	6.26501
11	6.22705
11.5	6.19506
12	6.16924
12.5	6.14428
13	6.09973
13.5	6.05744
14	6.01591
14.5	5.97869
15	5.92754
15.5	5.87489
16	5.82112
16.5	5.76852
17	5.71713
17.5	5.65688
18	5.59955
18.5	5.54287
19	5.47536
19.5	5.40704
20	5.33775
20.5	5.27564
21	5.20478
21.5	5.118
22	5.04834
22.5	4.97857
23	4.90427
23.5	4.82665
24	4.75426
24.5	4.67827
25	4.60291
25.5	4.5243
26	4.44717
26.5	4.37386
27	4.29663
27.5	4.22011
28	4.14432
28.5	4.0695
29	3.99588
29.5	3.9162
30	3.8376
30.5	3.76
31	3.68747
31.5	3.60937
32	3.53562
32.5	3.4605
33	3.3864
33.5	3.31188
34	3.24458
34.5	3.17706
35	3.10875
35.5	3.04175
36	2.97113
36.5	2.90416
37	2.83776
37.5	2.77058
38	2.69801
38.5	2.63014
39	2.56365
39.5	2.50849
40	2.45681
40.5	2.40222
41	2.34373
41.5	2.29484
42	2.23786
42.5	2.18826
43	2.13711
43.5	2.08607
44	2.03503
44.5	1.9922
45	1.94979
45.5	1.89942
46	1.84433
46.5	1.79268
47	1.74959
47.5	1.72256
48	1.66652
48.5	1.61649
49	1.58363
49.5	1.55847
50	1.52071
50.5	1.48558
51	1.45142
51.5	1.41818
52	1.38586
52.5	1.35442
53	1.32383
53.5	1.29407
54	1.26511
54.5	1.23694
55	1.20952
55.5	1.18284
56	1.15687
56.5	1.13159
57	1.10699
57.5	1.08304
58	1.05972
58.5	1.03702
59	1.01492
59.5	0.993394
60	0.972433
60.5	0.952018
61	0.932133
61.5	0.912764
62	0.893895
62.5	0.875512
63	0.8576
63.5	0.840146
64	0.823137
64.5	0.80656
65	0.790402
65.5	0.774652
66	0.759297
66.5	0.744326
67	0.729728
67.5	0.715492
68	0.701609
68.5	0.688067
69	0.674856
69.5	0.661968
70	0.649393
70.5	0.637939
71	0.625058
71.5	0.613359
72	0.600712
72.5	0.588945
73	0.577622
73.5	0.566977
74	0.55684
74.5	0.546914
75	0.537287
75.5	0.52803
76	0.518852
76.5	0.509956
77	0.50149
77.5	0.493308
78	0.484869
78.5	0.476823
79	0.469022
79.5	0.461648
80	0.454756
80.5	0.447952
81	0.441323
81.5	0.434902
82	0.428546
82.5	0.421854
83	0.415975
83.5	0.410436
84	0.405794
84.5	0.400713
85	0.395543
85.5	0.390869
86	0.385492
86.5	0.381577
87	0.377171
87.5	0.373449
88	0.369198
88.5	0.364326
89	0.359479
89.5	0.356406
90	0.353034
90.5	0.348207
91	0.344768
91.5	0.342439
92	0.340195
92.5	0.337508
93	0.33384
93.5	0.330215
94	0.327365
94.5	0.324715
95	0.322287
95.5	0.319668
96	0.31827
96.5	0.316604
97	0.314459
97.5	0.311299
98	0.308719
98.5	0.307229
99	0.303632
99.5	0.299504
100	0.295641
100.5	0.28995
101	0.285504
101.5	0.28209
102	0.279029
102.5	0.275737
103	0.272378
103.5	0.268493
104	0.266125
104.5	0.26348
105	0.260747
105.5	0.25792
106	0.255521
106.5	0.253383
107	0.250273
107.5	0.247779
108	0.245332
108.5	0.243661
109	0.242158
109.5	0.240458
110	0.239067
110.5	0.237594
111	0.236223
111.5	0.234688
112	0.233688
112.5	0.233238
113	0.232839
113.5	0.231908
114	0.23137
114.5	0.230992
115	0.229954
115.5	0.228941
116	0.227884
116.5	0.227607
117	0.227004
117.5	0.226569
118	0.226276
118.5	0.225975
119	0.225596
119.5	0.225758
120	0.225484
120.5	0.225467
121	0.225184
121.5	0.225158
122	0.225135
122.5	0.225176
123	0.225286
123.5	0.22523
124	0.225178
124.5	0.225454
125	0.225901
125.5	0.226365
126	0.226567
126.5	0.227194
127	0.227741
127.5	0.228006
128	0.228399
128.5	0.228703
129	0.229408
129.5	0.23012
130	0.231137
130.5	0.231984
131	0.232618
131.5	0.233624
132	0.23421
132.5	0.234727
133	0.236356
133.5	0.236191
134	0.236565
134.5	0.237194
135	0.23792
135.5	0.23879
136	0.239833
136.5	0.240944
137	0.241946
137.5	0.242718
138	0.243105
138.5	0.243921
139	0.24422
139.5	0.244634
140	0.245094
140.5	0.245664
141	0.246682
141.5	0.24713
142	0.247774
142.5	0.248544
143	0.249177
143.5	0.250009
144	0.250726
144.5	0.251456
145	0.252202
145.5	0.253476
146	0.253796
146.5	0.254603
147	0.255112
147.5	0.255986
148	0.256644
148.5	0.257494
149	0.25833
149.5	0.259129
150	0.25987
150.5	0.260416
151	0.261098
151.5	0.261613
152	0.262389
152.5	0.262962
153	0.26403
153.5	0.264891
154	0.265433
154.5	0.265824
155	0.266143
155.5	0.266337
156	0.266315
156.5	0.26628
157	0.266328
157.5	0.265797
158	0.265324
158.5	0.265053
159	0.264185
159.5	0.263582
160	0.262894
160.5	0.262191
161	0.261515
161.5	0.260721
162	0.260243
162.5	0.259565
163	0.258869
163.5	0.258157
164	0.257513
164.5	0.257
165	0.256196
165.5	0.255762
166	0.255465
166.5	0.254919
167	0.254527
167.5	0.254398
168	0.25476
168.5	0.255087
169	0.254876
169.5	0.255387
170	0.255568
