# Supplementary material for: Development and validation of a CCD-laser aerosol detective system for measuring the ambient aerosol phase function
Source: Copernicus journal article supplement (doi:10.5194/amt-10-2313-2017), 2017-06-27
Supplement: Supplementary file 1 [file amt-10-2313-2017-supplement.zip › amt-10-2313-2017-supplement-title-page.pdf]

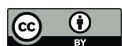

## *Supplement of*

# **Development and validation of a CCD-laser aerosol detective system for measuring the ambient aerosol phase function**

**Yuxuan Bian et al.**

*Correspondence to:* Chunsheng Zhao (zcs@pku.edu.cn)

- [amt-10-2313-2017-supplement-title-page.pdf](#)
- [Aerosol Phase Function Data.xlsx](#)

The copyright of individual parts of the supplement might differ from the CC BY 3.0 License.
